# Supplementary material for: Slow identification of facial happiness in early adolescence predicts onset of depression during 8 years of follow-up
Source: PubMed Central journal article supplement (PMC5083762; doi:10.1007/s00787-016-0846-1), 2016-04-22
Supplement: 787_2016_846_MOESM2_ESM.pdf [file 787_2016_846_MOESM2_ESM.pdf]

Article: Slow identification of facial happiness in early adolescence predicts onset of depression during eight years of follow-up

Journal: European Child & Adolescent Psychiatry

Authors: Charlotte Vrijen, Catharina A. Hartman, Albertine J. Oldehinkel

Affiliation: Interdisciplinary Center Psychopathology and Emotion regulation, Department of Psychiatry, University of Groningen, University Medical Center Groningen

Corresponding author: C. Vrijen@umcg.nl

## Online Resource 2

*Descriptives for reaction times and error proportions at age 11 by diagnostic group between age 11 and 19*

| Variables               | Mean (SD)                              |                                       |                                     |                                     |
|-------------------------|----------------------------------------|---------------------------------------|-------------------------------------|-------------------------------------|
|                         | Depression <sup>a</sup><br>N = 342-344 | Anhedonia <sup>b</sup><br>N = 614-617 | Sadness <sup>c</sup><br>N = 758-764 | Healthy <sup>d</sup><br>N = 797-800 |
| RT Happy <sup>e</sup>   | 887 (216)                              | 881 (203)                             | 879 (208)                           | 871 (206)                           |
| RT Sad <sup>e</sup>     | 1197 (284)                             | 1196 (273)                            | 1211 (302)                          | 1207 (278)                          |
| RT Angry <sup>e</sup>   | 1117 (248)                             | 1111 (257)                            | 1115 (262)                          | 1115 (258)                          |
| RT Fearful <sup>e</sup> | 1100 (266)                             | 1112 (278)                            | 1116 (281)                          | 1101 (273)                          |
| EP Happy <sup>f</sup>   | 3.0 (2.9)                              | 3.1 (3.3)                             | 3.2 (3.4)                           | 3.4 (3.3)                           |
| EP Sad <sup>f</sup>     | 12.1 (8.8)                             | 12.1 (8.8)                            | 12.7 (9.1)                          | 12.8 (9.4)                          |
| EP Angry <sup>f</sup>   | 8.1 (6.0)                              | 8.1 (5.9)                             | 8.2 (6.2)                           | 8.5 (6.0)                           |
| EP Fearful <sup>f</sup> | 7.2 (6.2)                              | 7.2 (6.4)                             | 7.4 (6.5)                           | 7.6 (6.5)                           |

<sup>a</sup> CIDI-based DSM-IV diagnosis of major depressive disorder, minor depressive disorder or dysthymia, with age of onset between 11 and 19;

<sup>b</sup> Symptoms of anhedonia for at least several consecutive days between age 11 and 19;

<sup>c</sup> Symptoms of sadness for at least several consecutive days between age 11 and 19;

<sup>d</sup> No depressive disorder or symptoms of anhedonia or sadness;

<sup>e</sup> RT = mean reaction time for correct responses measured in milliseconds, assessed at age 11

<sup>f</sup> EP = mean error proportion, assessed at age 11
