# Supplementary material for: Slow identification of facial happiness in early adolescence predicts onset of depression during 8 years of follow-up
Source: PubMed Central journal article supplement (PMC5083762; doi:10.1007/s00787-016-0846-1), 2016-04-22
Supplement: 787_2016_846_MOESM3_ESM.pdf [file 787_2016_846_MOESM3_ESM.pdf]

Article: Slow identification of facial happiness in early adolescence predicts onset of depression during eight years of follow-up

Journal: European Child & Adolescent Psychiatry

Authors: Charlotte Vrijen, Catharina A. Hartman, Albertine J. Oldehinkel

Affiliation: Interdisciplinary Center Psychopathology and Emotion regulation, Department of Psychiatry, University of Groningen, University Medical Center Groningen

Corresponding author: C. Vrijen@umcg.nl

### Online Resource 3

*Results logistic regression analyses of DSM-IV depression and symptoms of anhedonia and sadness for at least several days between age 11 and age 19 on facial emotion recognition reaction times at age 11 – **without correcting for sadness and anhedonia***

|                                          |                        | Anhedonia <sup>a</sup><br><i>without</i> sadness as<br>covariate<br>N=1732-1773 |     | Sadness <sup>b</sup> <i>without</i><br>anhedonia<br>as covariate<br>N=1748-1793 |            |
|------------------------------------------|------------------------|---------------------------------------------------------------------------------|-----|---------------------------------------------------------------------------------|------------|
|                                          |                        | OR                                                                              | P   | OR                                                                              | P          |
| <b>Emotions tested<br/>separately</b>    | RT Happy               | 1.04                                                                            | .50 | 1.00                                                                            | .95        |
|                                          | RT Sad                 | 0.94                                                                            | .24 | 1.02                                                                            | .74        |
|                                          | RT Angry               | 0.97                                                                            | .56 | 0.99                                                                            | .80        |
|                                          | RT Fearful             | 1.02                                                                            | .69 | 1.03                                                                            | .53        |
| <b>Models<br/>backward<br/>selection</b> | RT Happy               | 1.17                                                                            | .03 |                                                                                 |            |
|                                          | RT Sad                 | 0.84                                                                            | .02 |                                                                                 |            |
|                                          | RT Angry               |                                                                                 |     |                                                                                 |            |
|                                          | RT Fearful             |                                                                                 |     |                                                                                 |            |
| <b>Posthoc analyses</b>                  | RT Sad - RT Happy (HS) | 0.88                                                                            | .02 | Not tested                                                                      | Not tested |

<sup>a</sup> Symptoms of anhedonia for at least several consecutive days;

<sup>b</sup> Symptoms of sadness for at least several consecutive days;

All effects were adjusted for error proportions, gender and age at the time of the facial emotion task;

OR = odds ratio; RT = mean reaction time for correct responses; all RTs in this table are standardized (Z-values) with one exception: HS was calculated on unstandardized RT Sad and RT Happy and was standardized afterwards
