# Supplementary material for: Slow identification of facial happiness in early adolescence predicts onset of depression during 8 years of follow-up
Source: Springer Nature journal article supplement (doi:10.1007/s00787-016-0846-1), 2016-04-22
Supplement: MOESM4 [file 10044804]

Article: Slow identification of facial happiness in early adolescence predicts onset of depression during eight years of follow-up

Journal: European Child & Adolescent Psychiatry

Authors: Charlotte Vrijen, Catharina A. Hartman, Albertine J. Oldehinkel

Affiliation: Interdisciplinary Center Psychopathology and Emotion regulation, Department of Psychiatry, University of Groningen, University Medical Center Groningen

Corresponding author: C. Vrijen@umcg.nl

#### Online Resource 4

**Sample without participants with social phobia or generalized anxiety disorder - Results logistic regression analyses of DSM-IV depression and symptoms of anhedonia and sadness for at least several days between age 11 and age 19 on facial emotion recognition reaction times at age 11**

|                                   |                        | Depression <sup>a</sup> |     | Anhedonia <sup>b</sup> with sadness<br>as covariate |      | Sadness <sup>c</sup> with anhedonia<br>as covariate |            |
|-----------------------------------|------------------------|-------------------------|-----|-----------------------------------------------------|------|-----------------------------------------------------|------------|
|                                   |                        | N=1501-1540             |     | N=1434-1469                                         |      | N=1434-1469                                         |            |
|                                   |                        | OR                      | P   | OR                                                  | P    | OR                                                  | P          |
| <b>Emotions tested separately</b> | RT Happy               | 1.15                    | .06 | 1.06                                                | .36  | 1.01                                                | .93        |
|                                   | RT Sad                 | 1.04                    | .64 | 0.91                                                | .14  | 1.11                                                | .08        |
|                                   | RT Angry               | 1.06                    | .42 | 0.97                                                | .62  | 1.02                                                | .70        |
|                                   | RT Fearful             | 1.06                    | .42 | 1.02                                                | .70  | 1.10                                                | .11        |
| <b>Multi-emotion models</b>       | RT Happy               | 1.24                    | .03 | 1.28                                                | .004 | Not tested                                          | Not tested |
|                                   | RT Sad                 | 0.90                    | .30 | 0.77                                                | .002 | Not tested                                          | Not tested |
| <b>Posthoc analyses</b>           | RT Sad - RT Happy (HS) | 0.92                    | .25 | 0.82                                                | .002 | Not tested                                          | Not tested |

<sup>a</sup> CIDI-based DSM-IV diagnosis of major depressive disorder, minor depressive disorder or dysthymia;

<sup>b</sup> Symptoms of anhedonia for at least several consecutive days;

<sup>c</sup> Symptoms of sadness for at least several consecutive days;

All effects were adjusted for error proportions, gender and age at the time of the facial emotion recognition task;

OR = odds ratio; RT = mean reaction time for correct responses; all RTs in this table are standardized (Z-values) with one exception: HS was calculated on unstandardized RT Sad and RT Happy and was standardized afterwards
