# Supplementary material for: Slow identification of facial happiness in early adolescence predicts onset of depression during 8 years of follow-up
Source: Springer Nature journal article supplement (doi:10.1007/s00787-016-0846-1), 2016-04-22
Supplement: MOESM5 [file 10044804]

Article: Slow identification of facial happiness in early adolescence predicts onset of depression during eight years of follow-up

Journal: European Child & Adolescent Psychiatry

Authors: Charlotte Vrijen, Catharina A. Hartman, Albertine J. Oldehinkel

Affiliation: Interdisciplinary Center Psychopathology and Emotion regulation, Department of Psychiatry, University of Groningen, University Medical Center Groningen

Corresponding author: C. Vrijen@umcg.nl

### Online Resource 5

*Results logistic regression analyses of DSM-IV depression and symptoms of anhedonia and sadness for at least several days between age 11 and age 19 on facial emotion recognition reaction times at age 11, **adjusted for cohort status***

|                                   |                        | Depression <sup>a</sup> |     | Anhedonia <sup>b</sup> with sadness<br>as covariate |      | Sadness <sup>c</sup> with anhedonia<br>as covariate |            |
|-----------------------------------|------------------------|-------------------------|-----|-----------------------------------------------------|------|-----------------------------------------------------|------------|
|                                   |                        | N=1803-1815             |     | N=1716-1727                                         |      | N=1718-1727                                         |            |
|                                   |                        | OR                      | P   | OR                                                  | P    | OR                                                  | P          |
| <b>Emotions tested separately</b> | RT Happy               | 1.07                    | .29 | 1.04                                                | .44  | 0.97                                                | .56        |
|                                   | RT Sad                 | 0.98                    | .69 | 0.93                                                | .18  | 1.04                                                | .42        |
|                                   | RT Angry               | 1.02                    | .81 | 0.99                                                | .79  | 0.97                                                | .59        |
|                                   | RT Fearful             | 0.97                    | .58 | 1.01                                                | .82  | 1.04                                                | .48        |
| <b>Multi-emotion models</b>       | RT Happy               | 1.18                    | .06 | 1.21                                                | .015 | Not tested                                          | Not tested |
|                                   | RT Sad                 | 0.87                    | .12 | 0.81                                                | .008 | Not tested                                          | Not tested |
| <b>Posthoc analyses</b>           | RT Sad - RT Happy (HS) | 0.90                    | .11 | 0.86                                                | .007 | Not tested                                          | Not tested |

<sup>a</sup> CIDI-based DSM-IV diagnosis of major depressive disorder, minor depressive disorder or dysthymia;

<sup>b</sup> Symptoms of anhedonia for at least several consecutive days;

<sup>c</sup> Symptoms of sadness for at least several consecutive days;

All effects were adjusted for error proportions, gender, age at the time of the facial emotion recognition task, and cohort status;

OR = odds ratio; RT = mean reaction time for correct responses; all RTs in this table are standardized (Z-values) with one

exception: HS was calculated on unstandardized RT Sad and RT Happy and was standardized afterwards
